# Supplementary material for: Molecular Mechanisms Underlying the Effects of Bimin Kang Mixture on Allergic Rhinitis: Network Pharmacology and RNA Sequencing Analysis
Source: Hindawi journal article supplement (doi:10.1155/2022/7034078), 2022-01-01

NF-KAPPA B SIGNALING PATHWAY

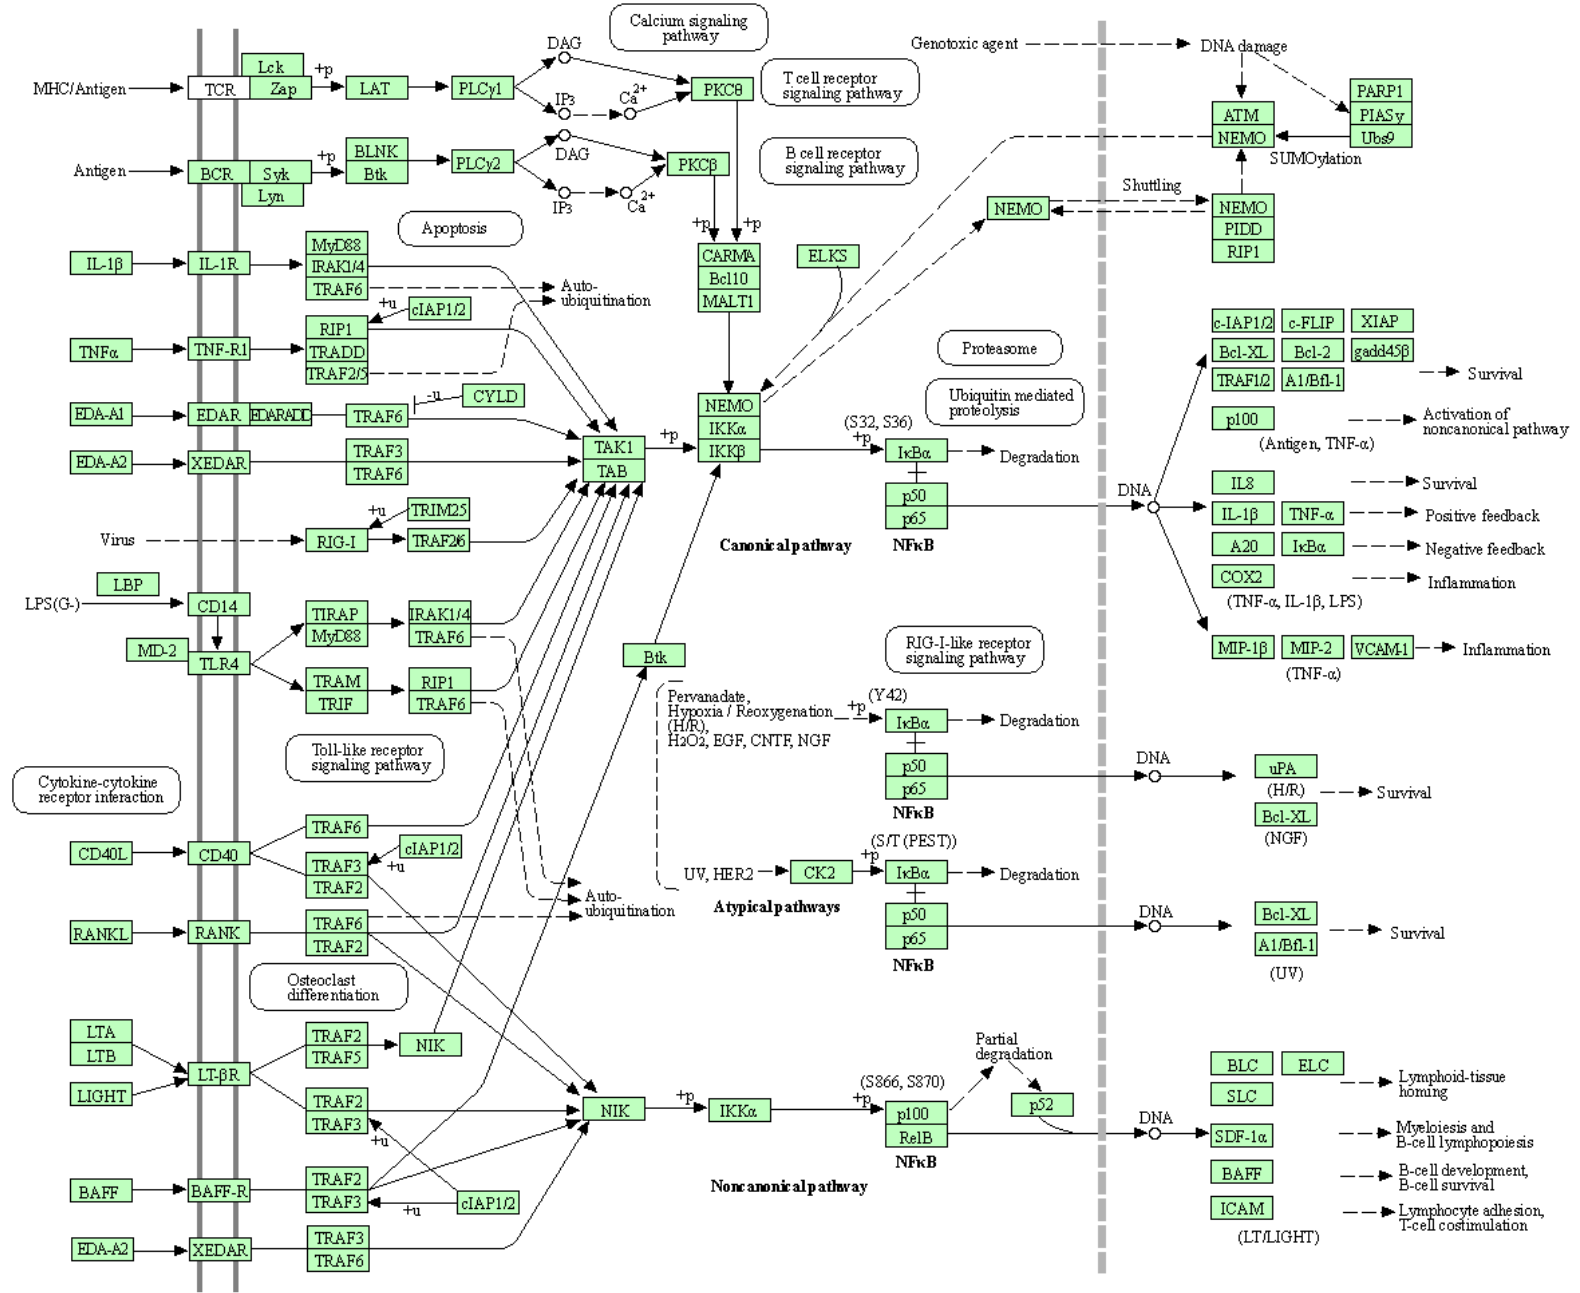

Supplement: f1 [file 7034078.f1.pdf]
